# Supplementary material
Source: PubMed Central journal article supplement (PMC3621505)
Supplement: supp_12-11102_IOVS-12-11102-s01.pdf [file supp_12-11102_IOVS-12-11102-s01.pdf]

**Supplementary Materials:**

| Genes         | Retina/RPE  |                       | Choroid     |                      | Sclera      |                      |
|---------------|-------------|-----------------------|-------------|----------------------|-------------|----------------------|
|               | Fold Change | p-value               | Fold Change | p-value              | Fold Change | p-value              |
| <i>PPFIA2</i> | NS          | NS                    | 2.35        | 1.3X10 <sup>-3</sup> | 1.5         | 1.6X10 <sup>-3</sup> |
| <i>PTPRF</i>  | 1.24        | 2.65X10 <sup>-5</sup> | 6.42        | 7X10 <sup>-4</sup>   | 1.11        | 1X10 <sup>-4</sup>   |
|               | 1.19        | 2.65X10 <sup>-5</sup> | NS          | NS                   | 1.11        | 3.3X10 <sup>-3</sup> |
| <i>PTPRR</i>  | 1.44        | 2.65X10 <sup>-5</sup> | 3.04        | 4.7X10 <sup>-3</sup> | NS          | NS                   |

**Supplementary Table S1. Genes Differentially Expressed Related to Candidate Genes from Association.** Genes selected for follow up validation by real time quantitative PCR. Multiple values for each gene indicate multiple probes within the same gene. NS indicates the fold change was not statistically significant.

| Gene/SNP          | Assay ID      |
|-------------------|---------------|
| <i>rs4764971</i>  | C_30866249_10 |
| <i>rs7134216</i>  | C_30023434_10 |
| <i>rs17306116</i> | C_33218892_10 |
| <i>rs3803036</i>  | C_25749934_20 |
| <i>rs824311</i>   | C_8342112_10  |
| <i>PPFIA2</i>     | Hs00170308_m1 |
| <i>PTPRF</i>      | Hs00160858_m1 |
| <i>PTPRR</i>      | Hs00373136_m1 |
| <i>18S</i>        | Hs03003631_g1 |
| <i>GAPDH</i>      | Hs02758991_g1 |

**Supplementary Table S2. Taqman® Genotyping and Gene Expression Assay Identification Numbers.**

| SNP               | Chimp | Orangutan | Rhesus | Marmoset | Mouse | Rat | Cow | Pig | Guinea Pig | Dog | Elephant | Opossum | Chicken |
|-------------------|-------|-----------|--------|----------|-------|-----|-----|-----|------------|-----|----------|---------|---------|
| <i>rs3803036</i>  | X     | X         | X      | X        | X     | X   | X   | X   | X          | X   | X        | X       | X       |
| <i>rs1520562</i>  | X     | X         | X      | X        |       |     |     |     | X          |     | X        |         |         |
| <i>rs1358228</i>  | X     | X         | X      | X        | X     | X   | X   | X   | X          | X   | X        |         |         |
| <i>rs17306116</i> | X     | X         | X      | X        |       |     |     |     |            | X   | X        |         |         |
| <i>rs790436</i>   | X     | X         | X      | X        |       |     |     |     | X          | X   | X        |         |         |
| <i>rs1558726</i>  | X     | X         | X      | X        | X     | X   |     |     | X          |     | X        |         |         |
| <i>rs741525</i>   | X     | X         |        | X        |       |     | X   | X   | X          | X   | X        |         |         |
| <i>rs7134216</i>  | X     | X         | X      | X        |       |     | X   |     | X          |     |          |         |         |
| <i>rs4764971</i>  | X     | X         | X      |          |       | X   | X   |     |            | X   | X        |         |         |

**Supplementary Table S3. Conservation of Top SNPs from Association.** X indicates SNP is conserved.

| Locus | OMIM   | Location | Reference study      | Myopia severity           | Genes                             | Nearby Genes |
|-------|--------|----------|----------------------|---------------------------|-----------------------------------|--------------|
|       |        |          |                      | Age of onset              |                                   |              |
| MYP1  | 310460 | Xq28     | Schwartz et al. 1990 | High: -6.75 D to -11.25 D | <i>MTM1 DUSP9</i><br><i>MTMR1</i> |              |
|       |        |          | Young et al. 2004    | Early: 1.5 to 5 years     |                                   |              |
| MYP2  | 160700 | 18p11.31 | Young et al. 1998    | High: -6 D to -21 D/      | <i>PTPRM PTPN2</i>                |              |

|               |        |                     |                                    |                                     |                                    |                        |
|---------------|--------|---------------------|------------------------------------|-------------------------------------|------------------------------------|------------------------|
|               |        |                     |                                    | Early: 6.8 years (average)          |                                    |                        |
| <b>MYP3</b>   | 603221 | 12q21 – q23         | Young et al. 1998                  | High: -6.25 D to -15 D              | <i>PTPRR PTPRB<br/>PTPRQ DUSP6</i> | <i>PTPN11<br/>SSH1</i> |
|               |        |                     |                                    | Early: 5.9 years (average)          |                                    |                        |
| <b>MYP4</b>   | 608367 | 7q36                | Naiglin et al. 2002                | High: -13.05 D (average)            | <i>PTPRN2</i>                      |                        |
| <b>MYP5</b>   | 608474 | 17q21 – q22         | Paluru et al. 2003                 | High: -5.5 D to -50 D               | <i>MTMR4</i>                       |                        |
|               |        |                     |                                    | Early: 8.9 years (average)          |                                    |                        |
| <b>MYP6</b>   | 608908 | 22q12               | Stambolian et al. 2004             | Mild-moderate: -1.00 D or lower     | <i>MTMR3<br/>DUSP18</i>            |                        |
| <b>MYP7</b>   | 609256 | 11p13               | Hammond et al. 2004                | -12.12 D to +7.25 D                 |                                    |                        |
| <b>MYP8</b>   | 609257 | 3q26                | Hammond et al. 2004                | -12.12 D to +7.25 D                 |                                    |                        |
| <b>MYP9</b>   | 609258 | 4q12                | Hammond et al. 2004                | -12.12 D to +7.25 D                 |                                    |                        |
| <b>MYP10</b>  | 609259 | 8p23                | Hammond et al. 2004                | -12.12 D to +7.25 D                 | <i>MTMR9</i>                       |                        |
| <b>MYP11</b>  | 609994 | 4q22 – q27          | Zhang, Guo et al. 2005             | High: -5 D to -20 D                 |                                    | <i>PTPN13</i>          |
|               |        |                     |                                    | Early: before school age            |                                    |                        |
| <b>MYP12</b>  | 609995 | 2q37.1              | Paluru et al. 2005                 | High: -7.25 D to -27 D              | <i>DUSP28</i>                      |                        |
|               |        |                     |                                    | Early: before 12 years              |                                    |                        |
| <b>MYP13</b>  | 300613 | Xq23 – q25          | Zhang, Guo et al. 2006             | High: -6 D to -20 D                 |                                    |                        |
|               |        |                     |                                    | Early: before school age            |                                    |                        |
| <b>MYP14</b>  | 610320 | 1p36                | Wojciechowski R, Moy C et al. 2006 | Moderate to high: -3.46 D (average) | <i>EYA3</i>                        |                        |
| <b>MYP15</b>  | 612717 | 10q21.1             | Nallasamy et al 2007               |                                     |                                    |                        |
| <b>MYP16</b>  | 612554 | 5p15.33-15.2        | Lam et al 2008                     | High grade myopia                   | <i>MTMR12</i>                      |                        |
| <b>HMYO21</b> |        | 21q22.3             | Nishizaki 2009                     |                                     |                                    |                        |
| <b>MYOX</b>   |        | DXS6800 and DXS6789 | Stambolian et al. 2005             |                                     |                                    |                        |
| <b>HMYOX</b>  |        | Xq25-q27.2          | Zhang et al 2007                   |                                     |                                    |                        |
|               |        | 7p15                | Ciner et al 2008                   | Quantitative trait locus in AA      |                                    |                        |
|               |        | 20 (47-62 cM)       | Ciner et al 2009                   |                                     |                                    |                        |
|               |        | 14q22.1-24.2        | Yang et al 2009                    |                                     | <i>STYX</i>                        |                        |
|               |        | 15q12-13            | Yu et al 2007                      |                                     | <i>MTMR10</i>                      |                        |
|               |        | 5q (98 cM)          | Zhu et al 2008                     |                                     | <i>DUSP1</i>                       |                        |

**Supplementary Table S4. PTP Related Genes in Known Myopia Loci.** Myopia Loci were taken from NEIBank: Candidate Disease Loci – Myopia and Hornbeak et al 2009.

A)

| Qualitative (APL)           |            |          |            |          |                                    |           |          |       |           |          |                        |
|-----------------------------|------------|----------|------------|----------|------------------------------------|-----------|----------|-------|-----------|----------|------------------------|
| Notes                       | Marker     | SE       | Marker     | SPH      | Notes                              | Marker    | Cauc SPH | Notes | Marker    | Cauc SE  | Notes                  |
|                             | RS741525   | 0.001547 | RS741525   | 0.000628 | 55 kb from <i>SLC9A7P1</i>         | RS741525  | 0.000509 |       | RS790436  | 0.000998 |                        |
|                             | RS3803036  | 0.002173 | RS7134216  | 0.00008  | intronic <i>UHRF1BP1L</i>          | RS790436  | 0.00078  |       | RS1358228 | 0.001603 |                        |
|                             | RS2698746  | 0.002434 | RS3803036  | 0.001224 | nonsyn. In <i>PTPRR</i>            | RS1358228 | 0.001293 |       | RS741525  | 0.00212  |                        |
|                             | RS7134216  | 0.003104 | RS1370780  | 0.001899 | 5' UTR <i>LOC253724</i>            | RS7134216 | 0.00274  |       | RS2698746 | 0.004536 |                        |
|                             | RS790436   | 0.003335 | RS1358228  | 0.002341 | 76 kb upstream <i>NAV3</i>         | RS1493418 | 0.004395 |       | RS7134216 | 0.004708 |                        |
|                             | RS1358228  | 0.003589 | RS12300992 | 0.004937 | 27 kb upstream of <i>MYBPC1</i>    | RS3803036 | 0.005651 |       | RS7297574 | 0.005339 | intronic <i>MGAT4C</i> |
| 30 kb from <i>LOC552889</i> | RS1389496  | 0.004111 | RS4842643  | 0.005714 | 36 kb upstream of <i>LOC728084</i> | RS953832  | 0.005668 |       | RS3803036 | 0.005679 |                        |
| intronic <i>TMTC2</i>       | RS17779858 | 0.008538 | RS824311   | 0.005908 | 3 kb upstream of <i>UTP20</i>      | RS4573768 | 0.005923 |       | RS1163038 | 0.007154 | intronic <i>PTPRQ</i>  |

  

| Quantitative (QTL)        |            |          |            |           |                                                 |            |           |                        |            |          |                           |
|---------------------------|------------|----------|------------|-----------|-------------------------------------------------|------------|-----------|------------------------|------------|----------|---------------------------|
| Notes                     | Marker     | SE       | Marker     | SPH       | Notes                                           | Marker     | Cauc SPH  | Notes                  | Marker     | Cauc SE  | Notes                     |
|                           | RS7134216  | 2.84E-06 | RS4764971  | 5.462E-07 | 3' UTR of <i>DEPDC4</i> , intronic <i>ACTR6</i> | RS4764971  | 2.25E-07  |                        | RS7134216  | 4.64E-06 |                           |
|                           | RS4764971  | 3.94E-05 | RS7134216  | 3.098E-06 | intronic <i>UHRF1BP1L</i>                       | RS17306116 | 0.0000265 |                        | RS4764971  | 2.01E-05 |                           |
|                           | RS12297646 | 4.24E-05 | RS17306116 | 9.01E-06  | intronic <i>PPFIA2</i>                          | RS1520562  | 0.0000351 |                        | RS12814689 | 6.93E-05 |                           |
|                           | RS12814689 | 8.24E-05 | RS1520562  | 0.0000495 |                                                 | RS7134216  | 0.0000449 |                        | RS3817552  | 6.95E-05 | nonsyn. in <i>MYBPC1</i>  |
| nonsyn. in <i>MYBPC1</i>  | RS3817552  | 9.58E-05 | RS11104117 | 0.0001566 | intronic <i>MGAT4C</i>                          | RS1558726  | 0.0000636 |                        | RS1971036  | 0.000147 | 66 kb from <i>MIR4303</i> |
|                           | RS7304135  | 0.000136 | RS1558726  | 0.000194  |                                                 | RS1045741  | 0.0000938 | 3' UTR of <i>PRDM4</i> | RS1163038  | 0.000187 | intronic <i>PTPRQ</i>     |
| 66 kb from <i>MIR4303</i> | RS1971036  | 0.000143 | RS7315130  | 0.0002194 |                                                 | RS12814689 | 0.0002117 |                        | RS17805748 | 0.000199 | intronic <i>HCFC2</i>     |
| intronic <i>PTPRQ</i>     | RS1163038  | 0.000207 | RS10506977 | 0.0002209 |                                                 | RS17805748 | 0.0002591 |                        | RS7304135  | 0.000295 |                           |

B)

Qualitative (APL) SPH

| Notes                         | Marker    | ≤-5D SPH | Marker     | ≤-6D SPH | Notes                       |
|-------------------------------|-----------|----------|------------|----------|-----------------------------|
|                               | RS741525  | 0.000509 | RS790436   | 0.000547 |                             |
|                               | RS790436  | 0.00078  | RS1522315  | 0.001231 | intronic <i>PPFIA2</i>      |
| 76 kb upstream <i>NAV3</i>    | RS1358228 | 0.001293 | RS2730523  | 0.001656 |                             |
| intronic <i>UHRF1BP1L</i>     | RS7134216 | 0.00274  | RS7134216  | 0.002071 | intronic <i>UHRF1BP1L</i>   |
| intronic <i>MGAT4C</i>        | RS1493418 | 0.004395 | RS4482093  | 0.002881 | 21 kb upstream <i>PTPRQ</i> |
| nonsyn. In <i>PTPRR</i>       | RS3803036 | 0.005651 | RS2598544  | 0.003437 | 32 kb upstream <i>PTPRQ</i> |
|                               | RS953832  | 0.005668 | RS4842643  | 0.003755 |                             |
|                               | RS4573768 | 0.005923 | RS741525   | 0.004515 |                             |
| 3 kb upstream of <i>UTP20</i> | RS824311  | 0.006785 | RS3803036  | 0.006703 | nonsyn. In <i>PTPRR</i>     |
|                               | RS2698746 | 0.00779  | RS17782889 | 0.00698  | 9 kb from <i>LOC338758</i>  |

Qualitative (APL) SE

| Notes                      | Marker     | ≤-5D SE  | Marker    | ≤-6D SE  | Notes                   |
|----------------------------|------------|----------|-----------|----------|-------------------------|
|                            | RS790436   | 0.000998 | RS790436  | 0.000123 |                         |
| 76 kb upstream <i>NAV3</i> | RS1358228  | 0.001603 | RS809285  | 0.000358 | intronic <i>RIC8B</i>   |
|                            | RS741525   | 0.00212  | RS4842643 | 0.000527 |                         |
|                            | RS2698746  | 0.004536 | RS4762535 | 0.00322  | intronic <i>ANKS1B</i>  |
| intronic <i>UHRF1BP1L</i>  | RS7134216  | 0.004708 | RS3803036 | 0.003619 | nonsyn. In <i>PTPRR</i> |
| intronic <i>MGAT4C</i>     | RS7297574  | 0.005339 | RS741525  | 0.005731 |                         |
| nonsyn. In <i>PTPRR</i>    | RS3803036  | 0.005679 | RS2698746 | 0.005962 |                         |
| intronic <i>PTPRQ</i>      | RS1163038  | 0.007154 | RS7297574 | 0.006125 | intronic <i>MGAT4C</i>  |
| intronic <i>TMTC2</i>      | RS17779858 | 0.007614 | RS2730523 | 0.007474 |                         |
|                            | RS4842643  | 0.008589 | RS1370938 | 0.012457 | intronic <i>MSRB3</i>   |

**Supplementary Figure S1. Concordance of Tests.** A.) Top eight Qualitative and Quantitative SNPs (listed in order if statistical significance) comparing complete and Caucasian-only data for SE and SPH. B.) Top ten Qualitative SPH and SE SNPs (listed in order of statistical significance) comparing data by -5D and -6D affection criteria. Both) P-values are

color coded as blue, green and yellow for p-values  $< 10^{-4}$ ,  $10^{-3}$  and  $10^{-2}$  respectively. Red lines indicate the same SNP while dashed orange lines indicate SNPs in or near the same gene. SNPs lacking descriptions of location relative to genes are  $> 150\text{kb}$  from any gene. Concordance of the data can be seen at both the SNP (red lines) and gene (orange lines) level.

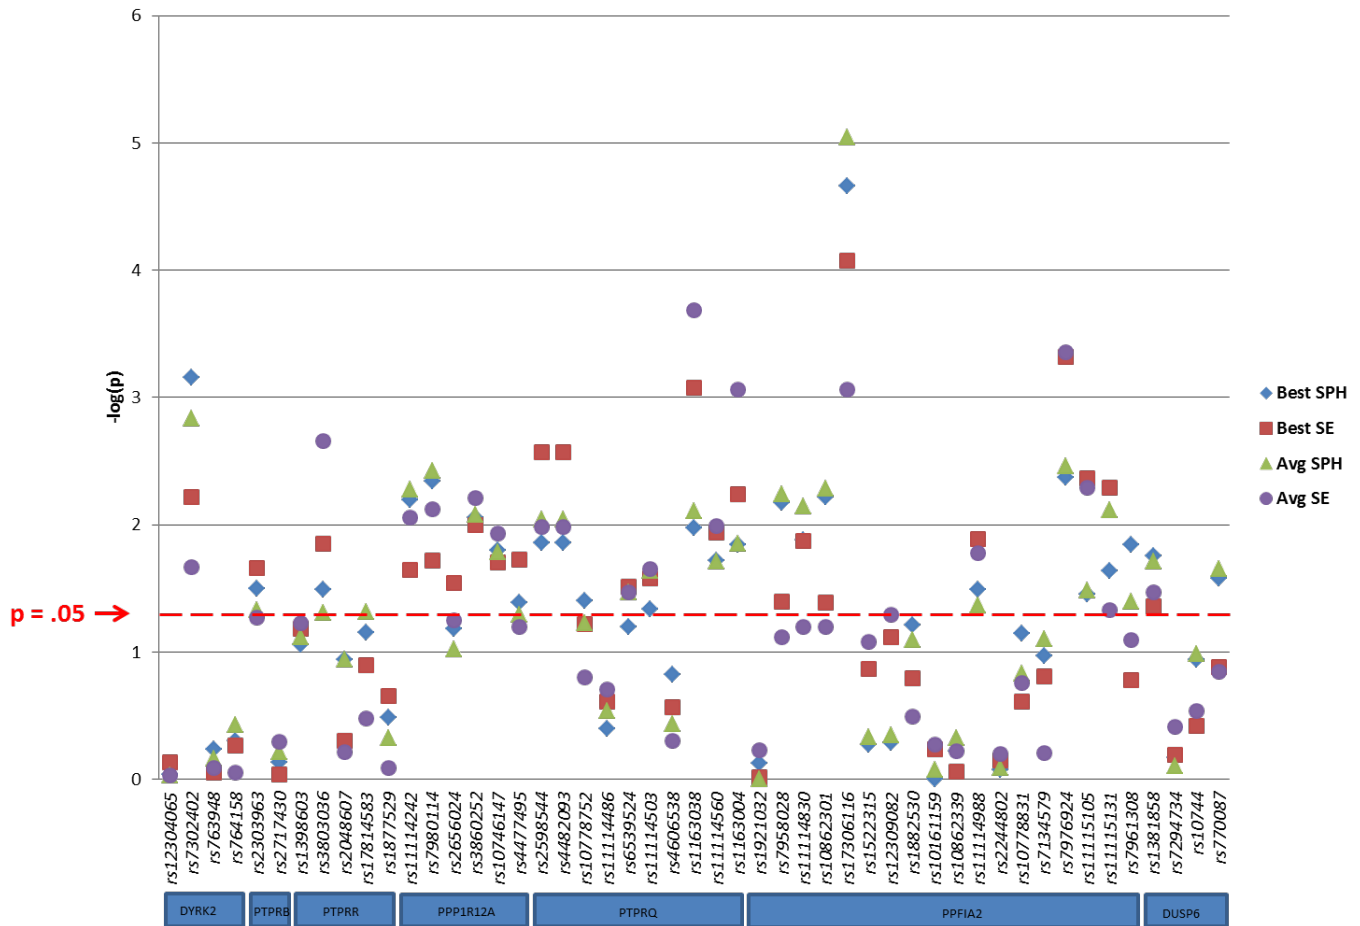

**Supplementary Figure S2. Quantitative Association by  $-\log(p)$  for All SNPs in PTP Related Genes.** SNPs are placed adjacent to one another for the purposes of this graph, but they are not representative of the chromosomal distance between genes. SPH is sphere; SE is spherical equivalence; avg is average of both eyes; best is the least myopic eye.
